fects on glucose tolerance resulting from increased relative weight, as also observed in our study (2).

We strictly support the statement of Mayer-Davis et al. (1) that breast-feeding should be recommended for all women. However, against the background of the rather exemplary arguments provided here, this story is far from being finished. Much more research is urgently needed, especially to ensure safety of our general recommendation also in the case of early neonatal breast-feeding by diabetic/overweight mothers.

ANDREAS PLAGEMANN, MD  
THOMAS HARDER, MD, MSCE  
ELKE RODEKAMP, MD  
JOACHIM W. DUDENHAUSEN, MD

From the Experimental Obstetrics Research Group, Clinic of Obstetrics, Charité – University Medicine Berlin, Campus Virchow-Klinikum, Berlin, Germany.

Address correspondence to Prof. Andreas Plagemann, MD, Head of Experimental Obstetrics, Charité – University Medicine Berlin, Campus Virchow-Klinikum, Augustenburger Platz 1, 13353 Berlin, Germany. E-mail: andreas.plagemann@charite.de.

DOI: 10.2337/dc06-2180

© 2007 by the American Diabetes Association.

## References

1. Mayer-Davis EJ, Rifas-Shiman SL, Zhou L, Hu FB, Colditz GA, Gillman MW: Breast-feeding and risk for childhood obesity. *Diabetes Care* 29:2231–2237, 2006
2. Plagemann A, Harder T, Franke K, Kohlhoff R: Long-term impact of neonatal breast-feeding on body weight and glucose tolerance in children of diabetic mothers. *Diabetes Care* 25:16–22, 2002
3. Rodekamp E, Harder T, Kohlhoff R, Franke K, Dudenhausen JW, Plagemann A: Long-term impact of breast-feeding on body weight and glucose tolerance in children of diabetic mothers: role of the late neonatal period and early infancy. *Diabetes Care* 28:1457–1462, 2005
4. Plagemann A, Harder T, Kohlhoff R, Rohde W, Dörner G: Overweight and obesity in infants of mothers with long-term insulin-dependent diabetes or gestational diabetes. *Int J Obes Relat Metab Disord* 21:451–456, 1997

## Breast-Feeding and Risk for Childhood Obesity

Response to Plagemann et al.

We appreciate the interest and comments of Plagemann et al. (1) regarding our study (2) on maternal status as a potential modifier of association of breast-feeding on childhood obesity. As noted, for the contrast of breast milk only versus formula only, the 95% CI excluded the null value, thus necessarily including values  $>1.0$ . From a statistical perspective, however, the best estimate for this contrast is an odds ratio (OR) of 0.79, not a value  $>1.0$ . Furthermore, the test for dose response suggested a statistically significant trend in the direction of protection by breast-feeding for both groups. Finally, there is no indication of a differential effect of breast-feeding according to maternal status. Specifically, for both exclusivity and duration of breast-feeding, the interaction term from fully adjusted models was  $P = 0.50$  and  $P = 0.66$ , respectively. Thus, our interpretation of the data is that there is no evidence of a deleterious effect of breast-feeding according to maternal obesity or diabetes status.

With regard to the second point raised by Plagemann et al. (1), the OR of 1.11 for overweight among children of diabetic mothers who were breast-fed  $<1$  month compared with those who were formula fed was in the same direction (i.e., potentially deleterious) as observed in the previous work by Plagemann et al. (3). We note that for this specific contrast, the 95% CI was quite wide (0.22–5.60), making interpretation difficult. Interestingly, the OR for the same contrast for nondiabetic mothers with BMI  $>25$  kg/m<sup>2</sup> was also  $>1.0$  (OR 1.46 [95% CI 1.01–2.13]). We noted in our original article (2) that to interpret this finding, one must consider potential circumstances related to the decision to stop breast-feeding at such a young age, as well as the infant-feeding behaviors in response to those circumstances. Here, while we agree with Plagemann et al. (1) that there

is a need for further work in this regard, we note that the context of breast-feeding duration during the neonatal period (i.e., choosing to stop or to continue breast-feeding) is extremely important to consider, rather than simply focusing on this time period in isolation.

Finally, our work was, in fact, very specifically motivated by that of Plagemann et al., and thus we certainly agree that this topic is of considerable importance. Our comments in our study (2) regarding potential explanations for differences in our findings were speculative; thus, we have no further comments in this regard.

ELIZABETH J. MAYER-DAVIS, PHD<sup>1</sup>  
SHERYL L. RIFAS-SHIMAN, MPH<sup>2</sup>  
LI ZHOU, BS<sup>1</sup>  
FRANK B. HU, MD, PHD<sup>3,4,5</sup>  
GRAHAM A. COLDITZ, MD, PHD<sup>3,4</sup>  
MATTHEW W. GILLMAN, MD, SM<sup>2,4,5</sup>

From the <sup>1</sup>Center for Research in Nutrition and Health Disparities, Department of Epidemiology and Biostatistics, Arnold School of Public Health, University of South Carolina, Columbia, South Carolina; the <sup>2</sup>Department of Ambulatory Care and Prevention, Harvard Medical School and Harvard Pilgrim Health Care, Boston, Massachusetts; the <sup>3</sup>Channing Laboratory, Brigham and Women's Hospital, Boston, Massachusetts; the <sup>4</sup>Department of Nutrition, Harvard School of Public Health, Boston, Massachusetts; and the <sup>5</sup>Department of Epidemiology, Harvard School of Public Health, Boston, Massachusetts.

Address correspondence to Elizabeth J. Mayer-Davis, PhD, Center for Research in Nutrition and Health Disparities, University of South Carolina, Arnold School of Public Health, 2718 Middleburg Dr., Columbia, SC 29208. E-mail: ejmayer@gwm.sc.edu.

DOI: 10.2337/dc06-2336

© 2007 by the American Diabetes Association.

## References

1. Plagemann A, Harder T, Rodekamp E, Dudenhausen JW: Breast-feeding and risk for childhood obesity (Letter). *Diabetes Care* 30:451–452, 2007
2. Mayer-Davis EJ, Rifas-Shiman SL, Zhou L, Hu FB, Colditz GA, Gillman MW: Breast-feeding and risk for childhood obesity. *Diabetes Care* 29:2231–2237, 2006
3. Plagemann A, Harder T, Franke K, Kohlhoff R: Long-term impact of neonatal breast-feeding on body weight and glucose tolerance in children of diabetic mothers. *Diabetes Care* 25:16–22, 2002
